# Supplementary material for: Degradation of a New Herbicide Florpyrauxifen-Benzyl in Water: Kinetics, Various Influencing Factors and Its Reaction Mechanisms
Source: MDPI journal article supplement (doi:10.3390/ijms241310521), 2023-06-23
Supplement: s1 [file s1]

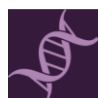

## Supplementary Material

# Degradation of a New Herbicide Florpyrauxifen-benzyl in Water: Kinetics, Various Influencing Factors and Its Reaction Mechanisms

Rendan Zhou <sup>1</sup>, Zemin Dong <sup>1,2</sup>, Long Wang <sup>1</sup>, Wenwen Zhou <sup>3</sup>, Weina Zhao <sup>2</sup>, Tianqi Wu <sup>1</sup>, Hailong Chang <sup>1</sup>, Wei Lin <sup>1</sup> and Baotong Li <sup>1,\*</sup>

**Table S1.** Temperature effect coefficient ( $Q$ ), activation energy ( $E_a$ ), activation enthalpy ( $\Delta H$ ), activation entropy ( $\Delta S$ ) and Gibbs free energy ( $\Delta G$ ) of florpyrauxifen-benzyl hydrolysis.

| Temperatur<br>e/K | Rate Constant<br>( $k$ )/d <sup>-1</sup> | $Q$    | $E_a$<br>/ kJ mol <sup>-1</sup> | $\Delta H$<br>/ kJ mol <sup>-1</sup> | $\Delta S$<br>/ kJ (mol K) <sup>-1</sup> | $\Delta G$<br>/ kJ mol <sup>-1</sup> |
|-------------------|------------------------------------------|--------|---------------------------------|--------------------------------------|------------------------------------------|--------------------------------------|
| 288               | 0.0086                                   | /      | 140.0197                        | 137.6253                             | 0.2960                                   | 52.3798                              |
| 298               | 0.0529                                   | 6.1739 | 140.0197                        | 137.5421                             | 0.2957                                   | 49.4213                              |
| 308               | 0.3573                                   | 6.7530 | 140.0197                        | 137.4590                             | 0.2954                                   | 46.4656                              |
| 323               | 4.6981                                   | /      | 140.0197                        | 137.3343                             | 0.2950                                   | 42.0371                              |

**Table S2.** Information on the disposable face masks (DFMs).

| Brand                      | Mass/g        | Retail<br>Price/CNY <sup>a</sup> | Production<br>Date | Executive<br>Standard | Materials |
|----------------------------|---------------|----------------------------------|--------------------|-----------------------|-----------|
| JIEMIAN                    | 2.8126~2.9325 | 0.3                              | 2022.03            | YY0469-2011           | PP/PET    |
| Size / cm                  | Color         |                                  |                    |                       |           |
| 17.5× 9.5-<br>three layers | Blue/White    |                                  |                    |                       |           |

Note: a: We divided the total purchase price by the number of the masks.

**Table S3.** Composition of artificial seawater.

| Metal Salts                                                            | Amount/mg L <sup>-1</sup> |
|------------------------------------------------------------------------|---------------------------|
| Sodium chloride, NaCl                                                  | 24.3200                   |
| Magnesium chloride, MgCl <sub>2</sub>                                  | 5.1400                    |
| Calcium chloride anhydrous, CaCl <sub>2</sub>                          | 1.1400                    |
| Potassium chloride, KCl                                                | 0.6900                    |
| Sodium bicarbonate, NaHCO <sub>3</sub>                                 | 0.2000                    |
| Potassium bromide, KBr                                                 | 0.1000                    |
| Boric acid, H <sub>3</sub> BO <sub>3</sub>                             | 0.0270                    |
| Strontium chloride hexahydrate, SrCl <sub>2</sub> ×6H <sub>2</sub> O   | 0.0260                    |
| Ammonium chloride, NH <sub>4</sub> Cl                                  | 0.0064                    |
| Sodium fluoride, NaF                                                   | 0.0030                    |
| Sodium metasilicate, Na <sub>2</sub> SiO <sub>3</sub>                  | 0.0020                    |
| Iron(III) phosphate tetrahydrate, FePO <sub>4</sub> ×4H <sub>2</sub> O | 0.0010                    |

The artificial seawater solution pH is 8.18.

**Table S4.** The mass spectrometry conditions for the chromatographic analysis of florpyrauxifen-benzyl.

| Compound               | Retention Time/min | Selected Ion          | Precursor Ion/m/z | Extracted Fragment Ion/m/z | DP/V        | CE/eV          | Ionization Mode  |
|------------------------|--------------------|-----------------------|-------------------|----------------------------|-------------|----------------|------------------|
| florpyrauxifen-benzyl  | 5.62               | [M+H] <sup>+</sup>    | 439.0422          | 50.0157                    | 90          | 145            | +                |
|                        |                    |                       |                   | 51.0235                    | 90          | 145            |                  |
|                        |                    |                       |                   | 63.0236                    | 90          | 140            |                  |
|                        |                    |                       |                   | 65.0387                    | 90          | 95             |                  |
|                        |                    |                       |                   | 91.0551*                   | 90          | 95             |                  |
| Ion source temperature | Spray voltage      | Capillary temperature | Gas1              | Gas2                       | Curtain Gas | EPI scan speed | Acquisition time |
| /°C                    | /V                 | /°C                   | /psi              | /psi                       | /psi        | /Da/s          | /ms              |
| 550                    | 5500               | 320                   | 50                | 55                         | 35          | 10000          | 100              |

where “\*” represented quantitative ion, DP represented declustering potential and CE represented collision energy.

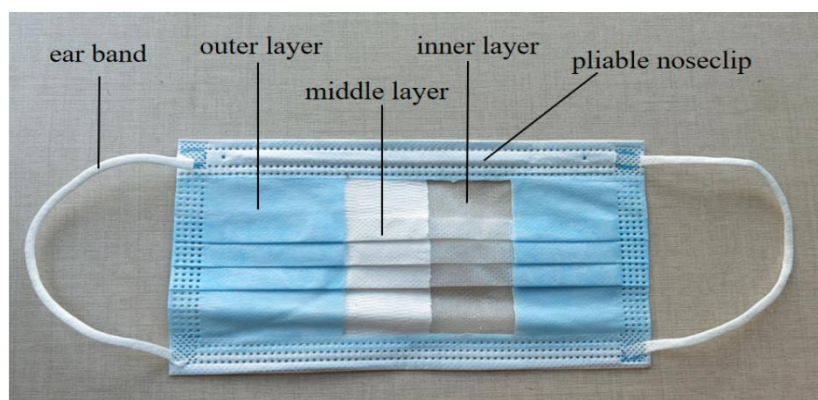**Figure S1.** The components of disposable face masks (DFMs).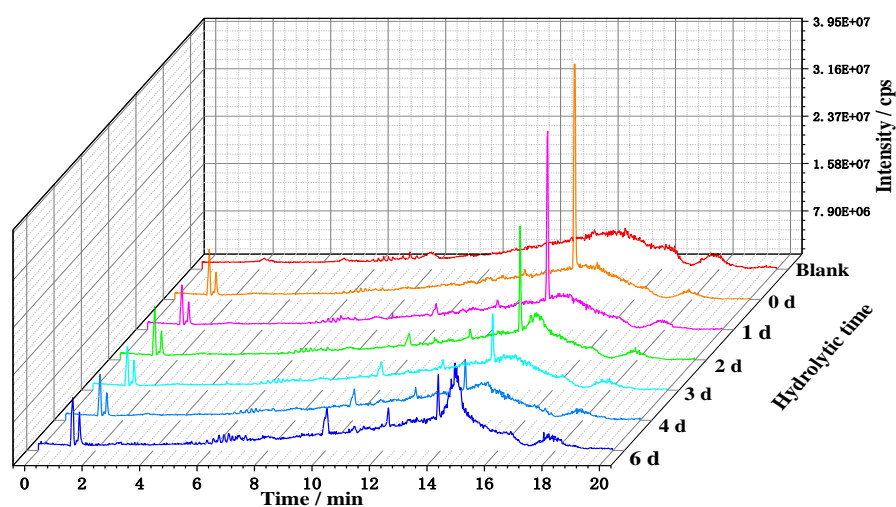**Figure S2.** The total ion chromatograms of florpyrauxifen-benzyl degradation solution performed by QTOF-MS/MS.

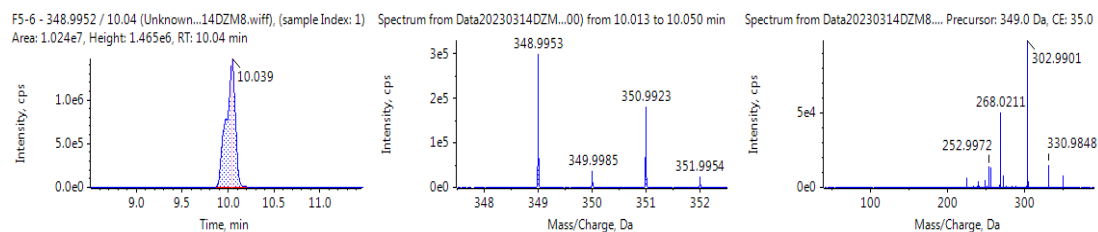

### Product a:

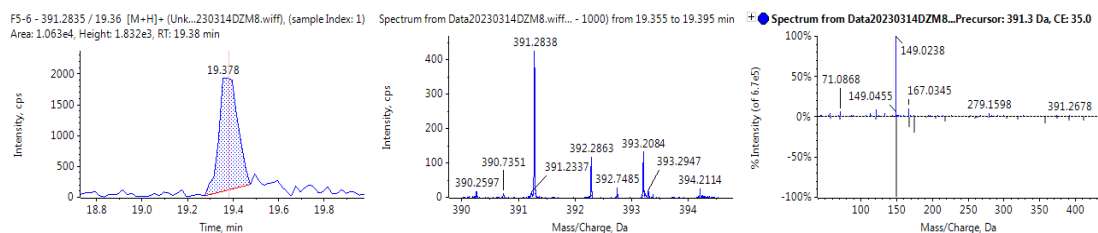

### Product b:

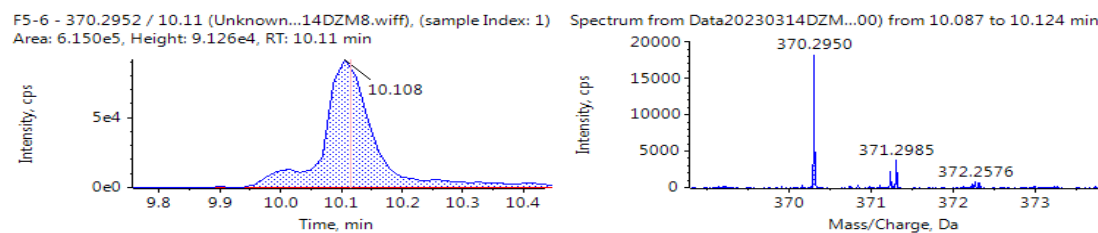

### Product c:

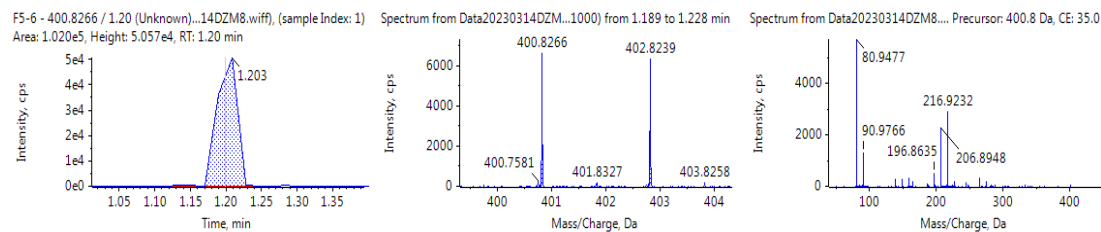

### Product d:

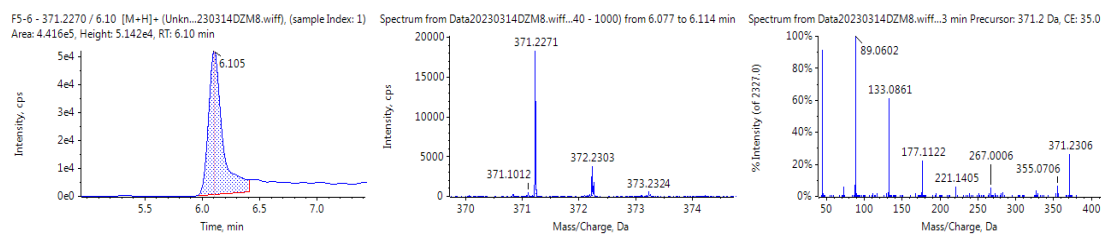

### Product e:

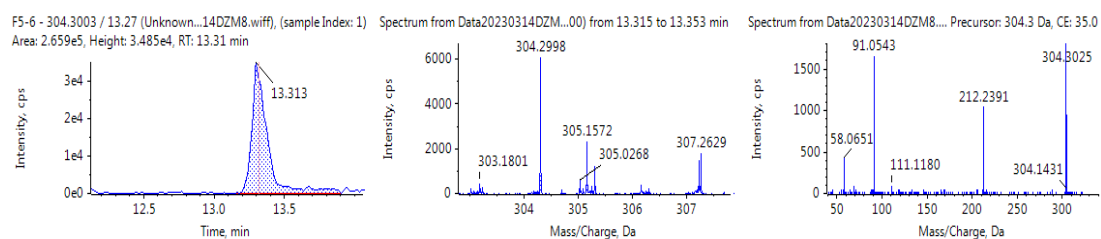

### Product g:

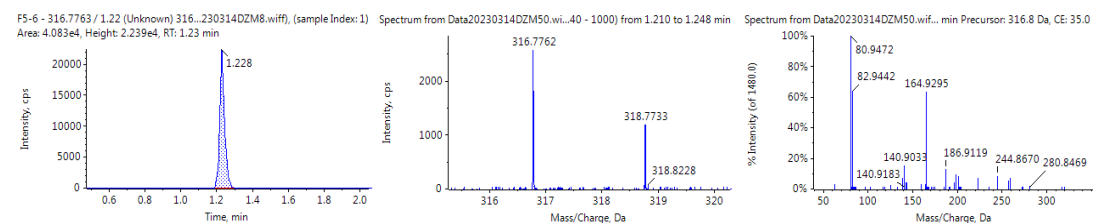

### Product h:

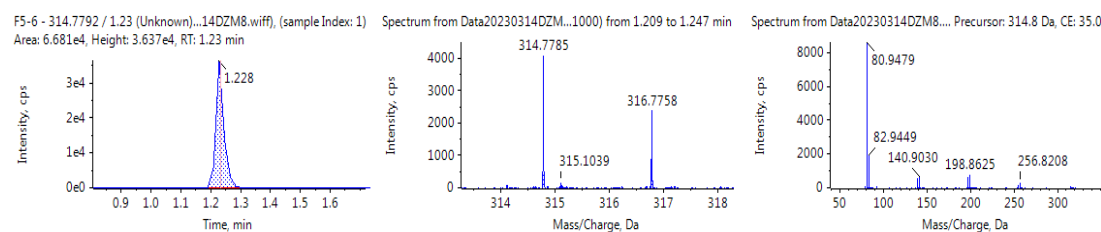

### Product i:

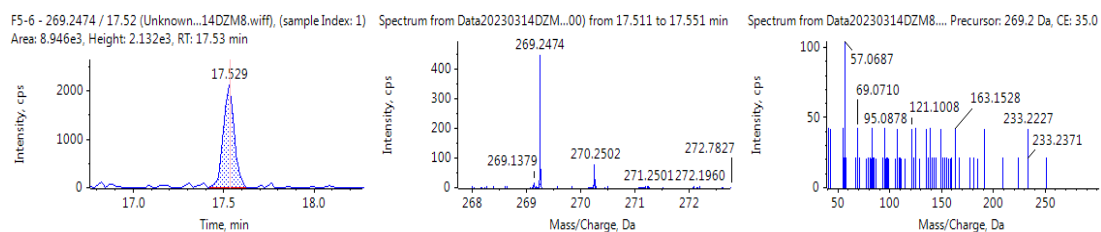

### Product j:

**Figure S3.** The primary and secondary mass spectrograms of the hydrolytic products.

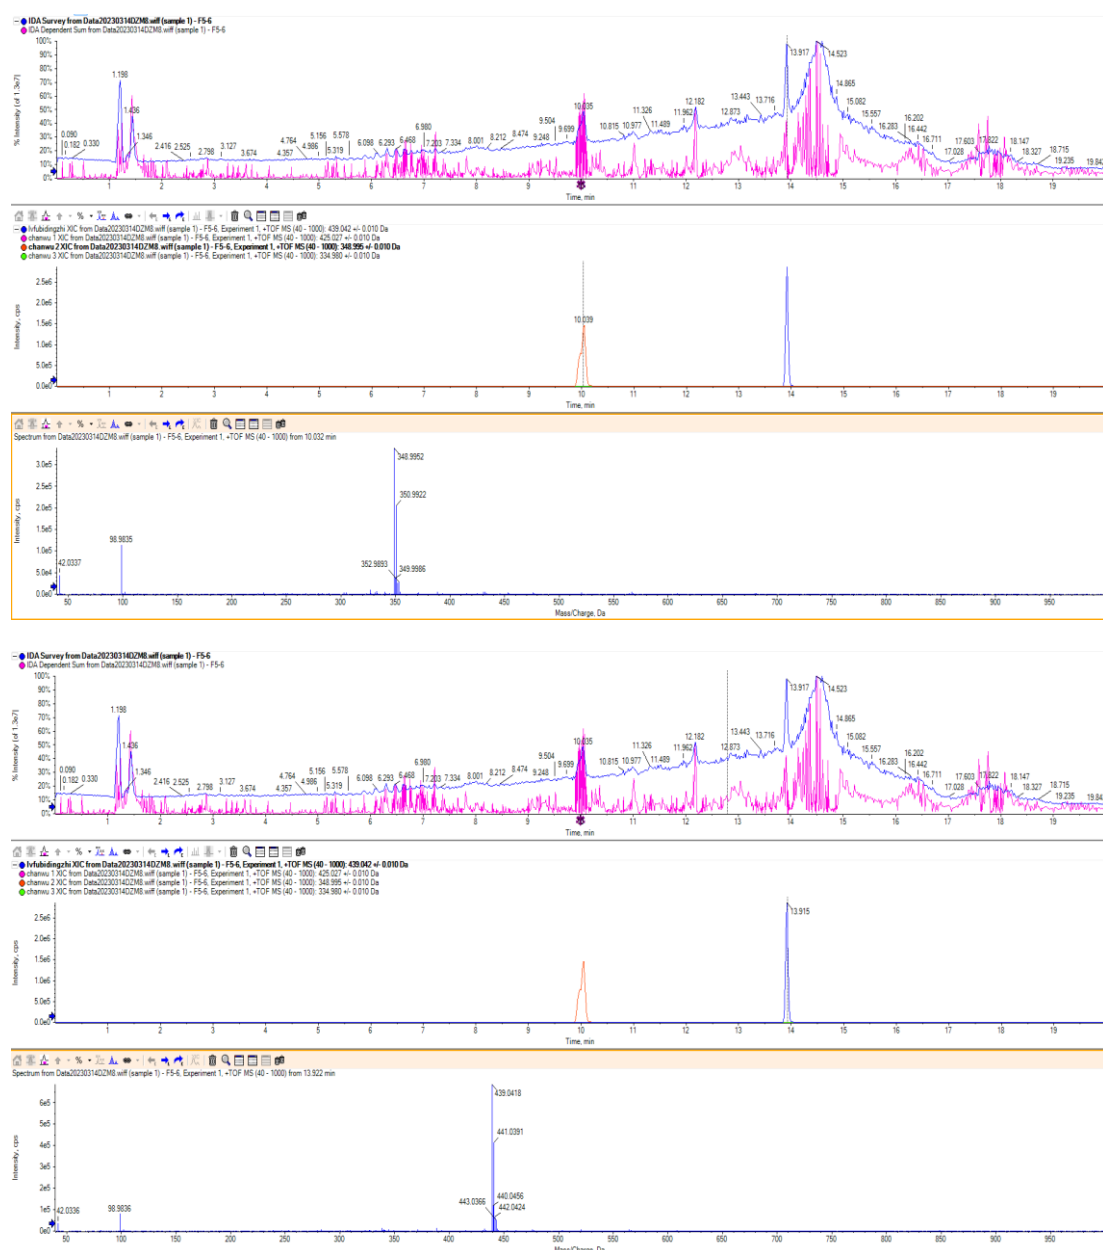

**Figure S4.** The total ion chromatograms and extraction ion chromatograms of florpyrauxifen-benzyl hydroxy and florpyrauxifen-hydroxy acid, primary mass spectrograms of florpyrauxifen (10.039 min) and florpyrauxifen-benzyl (13.915 min).
